# Supplementary material for: A Randomized, Double-Blind, Placebo-Controlled Investigation of Selenium Supplementation in Women at Elevated Risk for Breast Cancer: Lessons for Re-Emergent Interest in Selenium and Cancer
Source: MDPI journal article supplement (doi:10.3390/biomedicines11010049), 2022-12-25
Supplement: s1 [file s1]

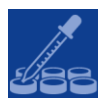

## Supplementary Materials

Table S1. Adverse events

| Adverse Event Type | Severity | Relation To Study Tablets | Details                                                       |
|--------------------|----------|---------------------------|---------------------------------------------------------------|
| Unanticipated      | Mild     | Possible                  | cramps, diarrhea, bloating                                    |
| Unanticipated      | Mild     | Possible                  | Stomach discomfort                                            |
| Unanticipated      | Mild     | Possible                  | Stomach discomfort                                            |
| Unanticipated      | Mild     | Not Related               | breast pain – follow up with oncologist.                      |
| Unanticipated      | Mild     | Unlikely                  | Sleeplessness                                                 |
| Unanticipated      | Mild     | Unlikely                  | Gastric reflux                                                |
| Unanticipated      | Moderate | Possible                  | Vomiting, stomach discomfort                                  |
| Unanticipated      | Mild     | Possible                  | stomach discomfort                                            |
| Unanticipated      | Mild     | Unlikely                  | "body vibrations" – follow up with primary care physician     |
| Unanticipated      | Mild     | Not Related               | Increased bilirubin - may be due to history of Crones disease |

Table S2. Primer sequences

| Gene | Primer Direction | Primer Sequence               | Probe Type | Probe Sequence                          |
|------|------------------|-------------------------------|------------|-----------------------------------------|
| SOD2 | Forward          | 5'-GGCTGTGCTTCTCGTCTCA-3'     | Wild Type  | 5'-FAM-TACCCCAAAGCCGGAGCCAC-3BHQ1-3'    |
|      | Reverse          | 5'-GCTGTGCTTGCCTGGAG-3'       | Mutant     | 5'-HEX-ATACCCCAAAGCCGGAGCCAG-3BHQ1-3'   |
| GPX1 | Forward          | 5'-CCATTGACATCGAGCCTGACATC-3' | Wild Type  | 5'-FAM-AGGCACAGCTGGGCCCTTGAGAC-3BHQ1-3' |
|      | Reverse          | 5'-GCCAAGCAGCCGGGTAG-3'       | Mutant     | 5'-HEX-AGGCACAGCTAGGCCCTTGAGAC-3BHQ1-3' |
| GPX4 | Forward          | 5'-GGACCTGCCCCACTATTCTAGC-3'  | Wild Type  | 5'-FAM-TGCCACAGCCCTTGGAGCCTT-3BHQ1-3'   |
|      | Reverse          | 5'-TGCACGCTGGATTTTCGGGT-3'    | Mutant     | 5'-TET-TGCCACAGCCCTCGGAGCCTT-3BHQ1-3'   |
| CAT  | Forward          | 5'-GGCGCCTGAAGGATGCT-3'       | Wild Type  | 5'-FAM-TGCCCGGATAGCCGAACCC-3BHQ1-3'     |
|      | Reverse          | 5'-GCCAGCAATTGGAGAGCCT-3'     | Mutant     | 5'-TET-TGCCCGGAATAGCCGAACCC-3BHQ1-3'    |

**Table S3. Results of Allelic Discrimination analysis by Gene SNP**

| <b>Gene</b> | <b>dbSNP ID</b> | <b>Genotype</b> | <b>Subjects</b> | <b>Observed Allelic Frequencies</b> |
|-------------|-----------------|-----------------|-----------------|-------------------------------------|
| SOD2        | rs1799725       | CC              | 32              | 0.34                                |
|             |                 | CT              | 37              | 0.39                                |
|             |                 | TT              | 25              | 0.27                                |
| GPX1        | rs1050450       | CC              | 40              | 0.43                                |
|             |                 | CT              | 47              | 0.50                                |
|             |                 | TT              | 7               | 0.07                                |
| GPX4        | rs713041        | TT              | 15              | 0.16                                |
|             |                 | TC              | 49              | 0.52                                |
|             |                 | CC              | 30              | 0.32                                |
| CAT         | rs1001179       | CC              | 57              | 0.61                                |
|             |                 | CT              | 33              | 0.35                                |
|             |                 | TT              | 4               | 0.04                                |
